# Supplementary material for: Phytochemicals from Vanda bensonii and Their Bioactivities to Inhibit Growth and Metastasis of Non-Small Cell Lung Cancer Cells
Source: MDPI journal article supplement (doi:10.3390/molecules27227902), 2022-11-15

# Phytochemicals from *Vanda bensonii* and Their Bioactivities to Inhibit Growth and Metastasis of Non-Small Cell Lung Cancer Cells

Tajudeen O. Jimoh <sup>1,2</sup>, Narawat Nuamnaichati <sup>3</sup>, Rungroch Sungthong <sup>3</sup>, Chaisak Chansriniyom <sup>4,5</sup>, Pithi Chanvorachote <sup>6,7</sup>, Kittisak Likhitwitayawuid <sup>4</sup>, Chatchai Chaotham <sup>3,7,\*</sup> and Boonchoo Sritularak <sup>4,8,\*</sup>

<sup>1</sup> Pharmaceutical Sciences and Technology Program, Faculty of Pharmaceutical Sciences, Chulalongkorn University, Bangkok 10330, Thailand

<sup>2</sup> Department of Biochemistry, Faculty of Health Sciences, Islamic University in Uganda, Kampala P.O. Box 7689, Uganda

<sup>3</sup> Department of Biochemistry and Microbiology, Faculty of Pharmaceutical Sciences, Chulalongkorn University, Bangkok 10330, Thailand

<sup>4</sup> Department of Pharmacognosy and Pharmaceutical Botany, Faculty of Pharmaceutical Sciences, Chulalongkorn University, Bangkok 10330, Thailand

<sup>5</sup> Natural Products and Nanoparticles Research Unit, Chulalongkorn University, Bangkok 10330, Thailand

<sup>6</sup> Department of Pharmacology and Physiology, Faculty of Pharmaceutical Sciences, Chulalongkorn University, Bangkok 10330, Thailand

<sup>7</sup> Center of Excellence in Cancer Cell and Molecular Biology, Pharmaceutical Sciences, Chulalongkorn University, Bangkok 10330, Thailand

<sup>8</sup> Center of Excellence in Natural Products for Ageing and Chronic Diseases, Faculty of Pharmaceutical Sciences, Chulalongkorn University, Bangkok 10330, Thailand;

\* Correspondence: cchoatham@gmail.com (C.Chaotham); Tel.: (+66 (0) 2218 8372), boonchoo.sr@chula.ac.th (B.S.); Tel. (+66 (0) 2218 8356)

**Figure S1.** Sigmoidal dose-response plots of NCI-H460 cells treated with varying concentrations of *Vanda bensonii* metabolites. Percentages of cell viability after treating cells with varying concentrations of *V. bensonii* metabolites for 24 h, assessed by a colorimetric method. All experiments were done at least in triplicates, and 0.5% (v/v) dimethyl sulfoxide served as the vehicle control. The graphical results represent means  $\pm$  standard deviations.

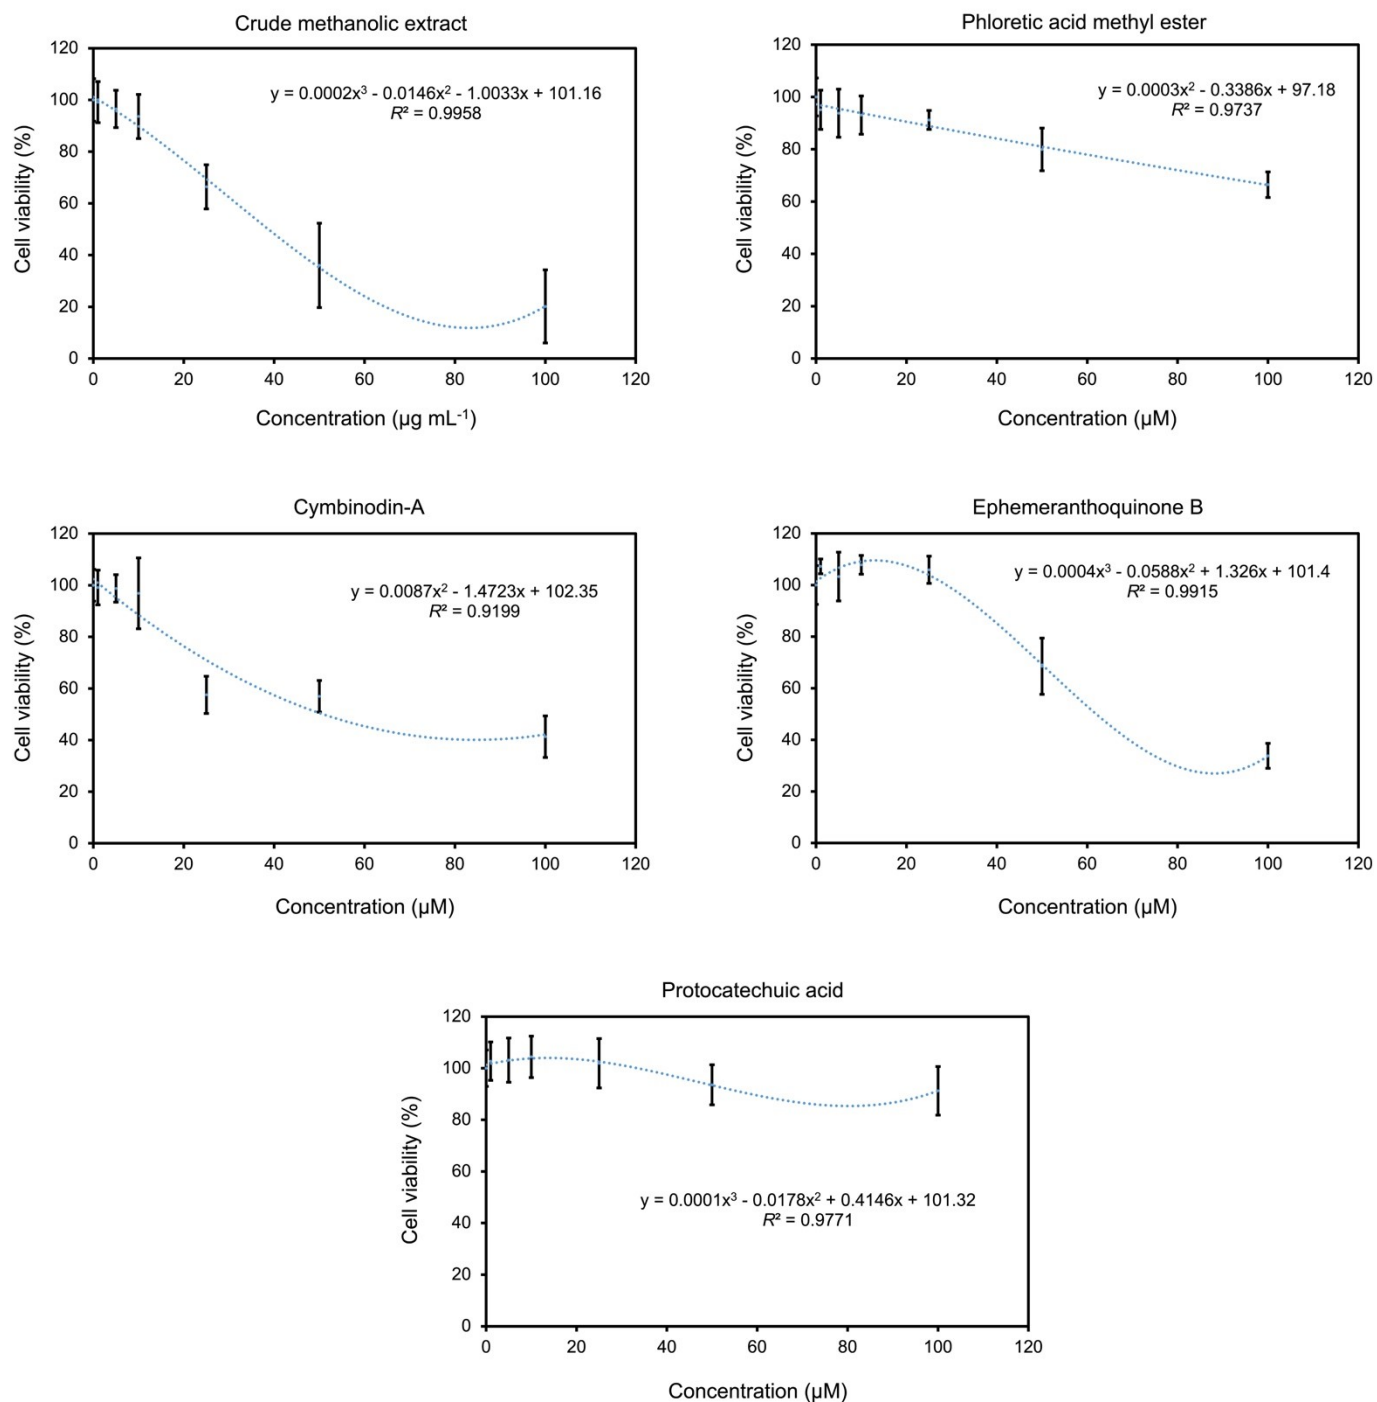

Supplement: s1 [file s1]
